# Supplementary material for: Fatostatin induces pro- and anti-apoptotic lipid accumulation in breast cancer
Source: PubMed Central journal article supplement (PMC6107643; doi:10.1038/s41389-018-0076-0), 2018-08-24
Supplement: 41389_2018_76_MOESM3_ESM.pdf [file 41389_2018_76_MOESM3_ESM.pdf]

## Untargeted lipidomics results

| NEGATIVE       |          | SET1       |        |         |        |         |         |         |        | SET2     |            |        |        |        |         |         |         | AVERAGE FOLD CHANGE |        |
|----------------|----------|------------|--------|---------|--------|---------|---------|---------|--------|----------|------------|--------|--------|--------|---------|---------|---------|---------------------|--------|
| lipid          | m/z      | R.T. (min) | DMSO_1 | DMSO_2  | DMSO_3 | FS_1    | FS_2    | FS_3    | FS/C_1 | m/z      | R.T. (min) | DMSO_1 | DMSO_2 | DMSO_3 | FS_1    | FS_2    | FS_3    |                     | FS/C_2 |
| FA(20:2)       | 307.2646 | 37.4       | 587312 | 742621  | 577250 | 1598276 | 1777438 | 1465667 | 2.5    | 307.2649 | 37.4       | 505296 | 449600 | 537969 | 1031601 | 980452  | 1124062 | 2.1                 | 2.3    |
| FA(22:4)       | 331.2656 | 37.4       | 258978 | 354220  | 327307 | 1123273 | 1243706 | 1034343 | 3.6    | 331.2658 | 37.4       | 347161 | 320074 | 332302 | 924882  | 869681  | 846105  | 2.6                 | 3.1    |
| FA(24:5)       | 357.2807 | 38.2       | 850347 | 1011806 | 837034 | 3219331 | 3295645 | 2673792 | 3.4    | 357.2805 | 38.3       | 771410 | 774894 | 728220 | 2318236 | 2374211 | 2514527 | 3.2                 | 3.3    |
| FA(24:4)       | 359.2957 | 39.6       | 239827 | 257707  | 202302 | 819591  | 772420  | 674412  | 3.2    | 359.2961 | 39.5       | 172473 | 172946 | 191231 | 522323  | 534804  | 601247  | 3.1                 | 3.2    |
| LPG(22:6)      | 555.2729 | 35.5       | 216930 | 229596  | 206979 | 446467  | 479321  | 474963  | 2.1    | 555.2734 | 35.5       | 193546 | 250499 | 256401 | 514462  | 536949  | 626588  | 2.4                 | 2.3    |
| C20 diHCer     | 594.5841 | 67.7       | 125043 | 122354  | 141310 | 343750  | 309644  | 326082  | 2.5    | 594.585  | 67.7       | 196509 | 152315 | 148542 | 418553  | 395071  | 407244  | 2.5                 | 2.5    |
| PG(22:6, 22:6) | 865.5041 | 49.3       | 498997 | 637876  | 460557 | 1663610 | 1315206 | 1230028 | 2.6    | 865.5047 | 49.3       | 477612 | 448616 | 460934 | 1308296 | 1286121 | 1168494 | 2.7                 | 2.7    |

| POSITIVE             |           | SET1       |              |              |              |          |          |          |        | SET2      |            |              |              |              |          |          |          | AVERAGE FOLD CHANGE |        |
|----------------------|-----------|------------|--------------|--------------|--------------|----------|----------|----------|--------|-----------|------------|--------------|--------------|--------------|----------|----------|----------|---------------------|--------|
| lipid                | m/z       | R.T. (min) | DMSO_1       | DMSO_2       | DMSO_3       | FS_1     | FS_2     | FS_3     | FS/C_1 | m/z       | R.T. (min) | DMSO_1       | DMSO_2       | DMSO_3       | FS_1     | FS_2     | FS_3     |                     | FS/C_2 |
| TAG(16:0,18:1,17:6)  | 852.7292  | 64.3       | Not detected | Not detected | Not detected | 1752471  | 1606298  | 1602161  | ACCUM  | 852.7312  | 63.9       | Not detected | Not detected | Not detected | 1490103  | 1266271  | 1276157  | ACCUM               | ACCUM  |
| TAG(18:0,18:1,20:4)  | 926.8194  | 66.8       | 5004735      | 6081708      | 5777987      | 14462099 | 12991723 | 11530120 | 2.3    | 926.8218  | 66.4       | 4160417      | 3913553      | 3907632      | 11026173 | 11149864 | 10352971 | 2.7                 | 2.5    |
| TAG(18:1,18:0,22:6)  | 950.8164  | 66.6       | 2360764      | 2588163      | 2614791      | 5957395  | 6002000  | 5855506  | 2.4    | 950.8239  | 66.3       | 1825744      | 1898428      | 1770863      | 5960373  | 5929833  | 5156673  | 3.1                 | 2.7    |
| TAG(18:1,18:1,24:4)  | 980.8732  | 67.3       | 3006021      | 3828569      | 3507473      | 7360603  | 7291299  | 7492047  | 2.1    | 980.8737  | 67.1       | 5270674      | 5005689      | 5165589      | 10343708 | 10319739 | 10330029 | 2.0                 | 2.1    |
| TAG(18:1,22:1,22:5)  | 1006.8929 | 67.5       | 1054614      | 1498608      | 1452766      | 3187212  | 3009213  | 3039809  | 2.3    | 1006.893  | 67.1       | 778458       | 847957       | 722166       | 2056442  | 1773413  | 1759150  | 2.4                 | 2.3    |
| TAG(18:1,18:0,22:5)  | 952.8356  | 66.9       | 4247657      | 4334566      | 4396482      | 8983927  | 8614673  | 8298174  | 2.0    | 952.8375  | 66.6       | 3059488      | 3466369      | 2845353      | 9178808  | 8518452  | 8342914  | 2.8                 | 2.4    |
| TAG(18:0,18:1,22:4)  | 954.8504  | 67.2       | 2020324      | 2357340      | 2043779      | 4976079  | 4669698  | 4888957  | 2.3    | 954.8536  | 66.8       | 2604811      | 2643786      | 2563938      | 6803474  | 7134154  | 6249314  | 2.6                 | 2.4    |
| TAG(24:1,18:1, 20:3) | 1010.9145 | 68.1       | Not detected | Not detected | Not detected | 1819307  | 1918426  | 1922366  | ACCUM  | 1010.9123 | 67.6       | Not detected | Not detected | Not detected | 988446   | 1102094  | 984616   | ACCUM               | ACCUM  |
| TAG(22:4,24:1,18:1)  | 1036.9281 | 68.2       | Not detected | Not detected | Not detected | 1567224  | 1584278  | 1634228  | ACCUM  | 1036.9263 | 67.8       | Not detected | Not detected | Not detected | 932465   | 984167   | 930174   | ACCUM               | ACCUM  |

# Targeted lipidomics results

Gray highlighted species are the results of untargeted analysis

## SET2

| Lipid family     | Lipid     | m/z                  | Adduct               | RT       | FS 1      | FS 2      | FS 3      | DMSO 1    | DMSO 2    | DMSO 3    | AVERAGE FS | AVERAGE DMSO | P-VAL   |      |
|------------------|-----------|----------------------|----------------------|----------|-----------|-----------|-----------|-----------|-----------|-----------|------------|--------------|---------|------|
| FAs              | C14:0     | 227.2011             | [M - H]-             | 31.8     | 18896267  | 19494459  | 21834818  | 15174147  | 9579152   | 13957319  | 20075181   | 12903539     | 0.02024 | *    |
|                  | C16:1     | 253.2168             | [M - H]-             | 33.1     | 9371845   | 8090832   | 9737489   | 6028844   | 5095707   | 7422619   | 9066722    | 6182390      | 0.02649 | *    |
|                  | C16:0     | 255.2324             | [M - H]-             | 34.9     | 112854787 | 103290207 | 107733736 | 92037945  | 67257621  | 119209682 | 107959577  | 92835083     | 0.37759 |      |
|                  | C18:3     | 277.2168             | [M - H]-             | 32.8     | 146327    | 146069    | 171403    | 101491    | 88616     | 91890     | 154600     | 93999        | 0.00280 | **   |
|                  | C18:2     | 279.2324             | [M - H]-             | 34.3     | 2273752   | 2398674   | 2336225   | 1649580   | 1159657   | 1734854   | 2336217    | 1514697      | 0.01087 | *    |
|                  | C18:1     | 281.2481             | [M - H]-             | 35.8     | 102794211 | 91711629  | 105842671 | 63909263  | 54714656  | 74965391  | 100116170  | 64529770     | 0.00803 | **   |
|                  | C18:0     | 283.2637             | [M - H]-             | 37.6     | 81722414  | 76866346  | 72353712  | 65154620  | 52106258  | 94823086  | 76980824   | 70694655     | 0.65215 |      |
|                  | C20:5     | 301.2168             | [M - H]-             | 33.2     | 838071    | 741144    | 808751    | 282266    | 260088    | 262599    | 795989     | 268318       | 0.00006 | **** |
|                  | C20:4     | 303.2324             | [M - H]-             | 34.6     | 3497205   | 3259235   | 4209832   | 1222869   | 1280097   | 1350679   | 3655424    | 1284548      | 0.00119 | **   |
|                  | C20:3     | 305.2481             | [M - H]-             | 35.5     | 942050    | 999603    | 1013413   | 475542    | 411267    | 553182    | 985022     | 479997       | 0.00041 | **   |
|                  | C20:2     | 307.2598             | [M - H]-             | 37.1     | 1031601   | 980452    | 1124062   | 505296    | 449600    | 537969    | 1045372    | 497622       | 0.00037 | **   |
|                  | C20:1     | 309.2699             | [M - H]-             | 38.1     | 30601030  | 28513431  | 22884739  | 13896058  | 16324639  | 12318516  | 27333067   | 14179737     | 0.00701 | **   |
|                  | C22:1     | 337.3107             | [M - H]-             | 40.5     | 3203263   | 3349202   | 3515514   | 2347066   | 1810183   | 2366327   | 3355993    | 2174525      | 0.00437 | **   |
|                  | C22:4     | 331.2656             | [M - H]-             | 36.7     | 924882    | 869681    | 846105    | 347161    | 320074    | 332302    | 880223     | 333179       | 0.00002 | **** |
|                  | C24:5     | 357.2807             | [M - H]-             | 37.6     | 2318236   | 2374211   | 2514527   | 771410    | 774894    | 728220    | 2402325    | 758175       | 0.00001 | **** |
| C24:4            | 359.2957  | [M - H]-             | 38.8                 | 522323   | 534804    | 601247    | 172473    | 172946    | 191231    | 552792    | 178884     | 0.00012      | **      |      |
| ceramides        | C16:1     | 534.48924            | [M - H]-             | 63.1     | 16330977  | 14968294  | 16798512  | 10508838  | 11407753  | 10061926  | 16032594   | 10659506     | 0.00136 | **   |
|                  | C18:1     | 562.52056            | [M - H]-             | 64.6     | 499126    | 475744    | 526579    | 287287    | 315300    | 305558    | 500483     | 302715       | 0.00030 | ***  |
|                  | C20:1     | 590.55188            | [M - H]-             | 66.3     | 1042971   | 971943    | 989311    | 586052    | 629614    | 606776    | 1001408    | 607481       | 0.00009 | **** |
|                  | C22:1     | 618.5832             | [M - H]-             | 67.3     | 7031208   | 6240062   | 6777450   | 3717929   | 3530854   | 3850844   | 6682907    | 3699876      | 0.00029 | **   |
|                  | C24:1     | 646.61452            | [M - H]-             | 68.9     | 29117843  | 26956064  | 21603081  | 19484735  | 18702287  | 18237430  | 25892329   | 18808151     | 0.03517 | *    |
|                  | C26:1     | 674.64584            | [M - H]-             | 69.1     | 29002262  | 25992646  | 25444948  | 20271963  | 21332366  | 21277664  | 26813285   | 20960665     | 0.00722 | **   |
|                  | C14       | 508.47326            | [M - H]-             | 62.4     | 5653470   | 5254241   | 5701988   | 3342245   | 3500151   | 3442465   | 5536567    | 3428287      | 0.00015 | **   |
|                  | C16       | 536.50458            | [M - H]-             | 64.2     | 174447406 | 157811968 | 179384984 | 122773225 | 126142965 | 127327345 | 170548119  | 125414512    | 0.00248 | **   |
|                  | C18       | 564.5359             | [M - H]-             | 65.9     | 9883277   | 9718689   | 11022677  | 6343869   | 6763751   | 6264818   | 10208214   | 6457479      | 0.00102 | **   |
|                  | C20       | 592.56722            | [M - H]-             | 67.0     | 5580354   | 5167600   | 5410548   | 3043337   | 3144999   | 4019022   | 5386167    | 3402453      | 0.00394 | **   |
|                  | C22       | 620.59854            | [M - H]-             | 67.8     | 13734714  | 13061555  | 13209655  | 8984210   | 8981349   | 9192874   | 13335308   | 9052811      | 0.00004 | **** |
|                  | C24       | 648.62986            | [M - H]-             | 70.7     | 54914866  | 51444918  | 47280707  | 45786395  | 37825663  | 43199992  | 51213497   | 42270683     | 0.04995 | *    |
| C26              | 676.66118 | [M - H]-             | 72.0                 | 31196437 | 34440516  | 36593025  | 21253260  | 21967532  | 24584429  | 34076659  | 22601740   | 0.00355      | **      |      |
| dihydroceramides | C16       | 538.52024            | [M - H]-             | 64.6     | 5032635   | 4653647   | 5142836   | 2000080   | 1921065   | 1835138   | 4943039    | 1918761      | 0.00004 | **** |
|                  | C20       | 594.58288            | [M - H]-             | 67.7     | 418553    | 395071    | 407244    | 196509    | 152315    | 148542    | 406956     | 165789       | 0.00014 | ***  |
|                  | C22       | 622.6142             | [M - H]-             | 69.2     | 678957    | 738763    | 782002    | 292943    | 257788    | 301942    | 733241     | 284224       | 0.00016 | ***  |
| Pls              | C38:5     | 883.5337             | [M - H]-             | 48.2     | 3666157   | 3723614   | 3764656   | 3536342   | 3517360   | 3658454   | 3718142    | 3570719      | 0.04877 | *    |
|                  | C38:4     | 885.5493             | [M - H]-             | 48.8     | 8830690   | 8691385   | 9029704   | 5252842   | 5389449   | 5813399   | 8850593    | 5485230      | 0.00007 | **** |
|                  | C38:1     | 891.5963             | [M - H]-             | 52.5     | 24155945  | 19516465  | 19513632  | 22286652  | 18255861  | 18312887  | 21062014   | 19618467     | 0.51878 |      |
| PEs              | C32:0     | 690.5074             | [M - H]-             | 54.1     | 3535210   | 4274699   | 3852902   | 5602298   | 5379748   | 6322774   | 3887604    | 5768273      | 0.00617 | ***  |
|                  | C36:3     | 740.5230             | [M - H]-             | 56.0     | 3379746   | 4815816   | 4381721   | 4937114   | 4900405   | 5459911   | 4192428    | 5099143      | 0.12121 |      |
|                  | C34:2     | 716.5230             | [M + H] <sup>+</sup> | 55.20    | 10945170  | 12369346  | 13349893  | 20250164  | 19137388  | 21098922  | 12221470   | 20162158     | 0.00091 | **   |
|                  | C34:1     | 718.5387             | [M + H] <sup>+</sup> | 55.70    | 8881045   | 10230345  | 10437307  | 13666008  | 13735248  | 15137556  | 9849566    | 14179604     | 0.00319 | **   |
|                  | C36:1     | 746.5700             | [M + H] <sup>+</sup> | 58.90    | 32911819  | 38595448  | 37282097  | 48291398  | 46896394  | 49360961  | 36263121   | 48182918     | 0.00305 | **   |
|                  | C36:2     | 744.5543             | [M + H] <sup>+</sup> | 58.20    | 47234475  | 62505493  | 52456448  | 65675880  | 66061340  | 70298835  | 54065472   | 67345351     | 0.04813 | *    |
|                  | C32:1     | 690.5074             | [M + H] <sup>+</sup> | 56.90    | 3794461   | 4288646   | 4452174   | 6310465   | 6363632   | 6832705   | 4177827    | 6502267      | 0.00084 | ***  |
| C38:1            | 774.6013  | [M + H] <sup>+</sup> | 57.93                | 14797424 | 15200136  | 15923817  | 12794227  | 11343164  | 12522887  | 15307126  | 12463426   | 0.01277      | **      |      |
| LPGs             | C18:1     | 509.2879             | [M - H]-             | 36.8     | 428176    | 339763    | 359099    | 187677    | 165721    | 219836    | 375679     | 191078       | 0.00404 | **   |
|                  | C20:4     | 531.2723             | [M - H]-             | 36.8     | 165038    | 168865    | 159121    | 78106     | 86002     | 99344     | 164341     | 87818        | 0.00036 | ***  |
|                  | C22:6     | 555.2729             | [M - H]-             | 35.5     | 514462    | 536949    | 626588    | 193546    | 250499    | 256401    | 559333     | 233482       | 0.00120 | **   |
| PGs              | C32:1     | 719.4863             | [M - H]-             | 48.2     | 2988124   | 3062833   | 2368736   | 2684327   | 1678681   | 2433584   | 2806564    | 2265531      | 0.22134 |      |
|                  | C32:0     | 721.502              | [M - H]-             | 49       | 1059766   | 1054527   | 1088972   | 1365425   | 1107951   | 1240229   | 1067755    | 1237868      | 0.08620 |      |
|                  | C44:12    | 865.5041             | [M - H]-             | 49.3     | 1308296   | 1286121   | 1168494   | 477612    | 448616    | 460934    | 1254304    | 462387       | 0.00006 | **** |
|                  | C32:0     | 647.4652             | [M - H]-             | 45.2     | 1374599   | 1049673   | 887992    | 1290213   | 1014007   | 867742    | 1104088    | 1057321      | 0.81698 |      |
|                  | C34:1     | 673.4808             | [M - H]-             | 46.4     | 5478655   | 4218814   | 3575847   | 5223610   | 4552827   | 3803345   | 4424439    | 4526594      | 0.88998 |      |

p ≤ 0.05 \*  
p ≤ 0.01 \*\*  
p ≤ 0.001 \*\*\*  
p ≤ 0.0001 \*\*\*\*

|     |       |          |          |      |         |         |         |         |         |         |         |         |         |   |
|-----|-------|----------|----------|------|---------|---------|---------|---------|---------|---------|---------|---------|---------|---|
| PAs | C36:3 | 697.4808 | [M - H]- | 47.2 | 156989  | 178674  | 154892  | 139370  | 89274   | 108685  | 163518  | 112443  | 0.03602 | * |
|     | C36:2 | 699.4965 | [M - H]- | 47.0 | 1545367 | 1471265 | 1015166 | 2197106 | 1787099 | 1672688 | 1343933 | 1885631 | 0.07793 | * |
|     | C38:4 | 723.4965 | [M - H]- | 46.8 | 273934  | 257632  | 256335  | 303372  | 258566  | 213470  | 262634  | 258469  | 0.88302 | * |

|       |           |            |            |        |           |           |              |              |              |              |              |              |         |      |
|-------|-----------|------------|------------|--------|-----------|-----------|--------------|--------------|--------------|--------------|--------------|--------------|---------|------|
| TAGS  | C48:0     | 824.7707   | [M + NH4]+ | 62.31  | 47593830  | 38669666  | 40402684     | 32508084     | 32712708     | 28798559     | 42222060     | 31339784     | 0.02254 | *    |
|       | C50:2     | 848.7707   | [M + NH4]+ | 64.52  | 77938585  | 68535248  | 77745192     | 75941990     | 80243701     | 74430611     | 74739675     | 76872100     | 0.58124 | *    |
|       | C50:1     | 850.7864   | [M + NH4]+ | 65.31  | 111308683 | 98886776  | 105228749    | 88817820     | 97655681     | 84722086     | 105141403    | 90398529     | 0.04806 | *    |
|       | C52:2     | 876.8020   | [M + NH4]+ | 65.72  | 116888674 | 118495523 | 109826681    | 118720522    | 134772143    | 118250639    | 115070293    | 123914435    | 0.21748 | *    |
|       | C54:6     | 896.7707   | [M + NH4]+ | 65.70  | 9935440   | 9403230   | 8994879      | 2685874      | 3046685      | 2881117      | 9444516      | 2871225      | 0.00002 | **** |
|       | C54:5     | 898.7864   | [M + NH4]+ | 67.33  | 12103455  | 12113159  | 10461487     | 3189825      | 3755860      | 3964366      | 11559367     | 3636683      | 0.00018 | **** |
|       | C54:4     | 900.8020   | [M + NH4]+ | 68.12  | 10374163  | 10960249  | 8110058      | 5271783      | 5400679      | 5340168      | 9814823      | 5337543      | 0.00676 | ***  |
|       | C54:3     | 902.8177   | [M + NH4]+ | 67.22  | 55175218  | 53579735  | 53392551     | 57176958     | 50432543     | 47646415     | 54049168     | 51751972     | 0.47050 | *    |
|       | C54:2     | 904.8333   | [M + NH4]+ | 66.79  | 96759803  | 83616838  | 88579286     | 81206982     | 70252283     | 74331505     | 89651976     | 75263590     | 0.04486 | *    |
|       | C56:8     | 920.7702   | [M + NH4]+ | 65.90  | 1422330   | 1350910   | 1299954      | 385823       | 453397       | 429898       | 1357731      | 423039       | 0.00002 | **** |
|       | C56:7     | 922.7858   | [M + NH4]+ | 66.20  | 9165482   | 7514133   | 7844924      | 1969904      | 2897322      | 2420474      | 8174846      | 2429234      | 0.00055 | ***  |
|       | C56:6     | 924.8020   | [M + NH4]+ | 66.40  | 11273573  | 12167454  | 9948180      | 3512867      | 3841962      | 3533247      | 11129736     | 3629359      | 0.00033 | ***  |
|       | C56:5     | 926.8171   | [M + NH4]+ | 66.80  | 10291067  | 11220174  | 8218336      | 3468370      | 3833243      | 3581513      | 9909859      | 3627709      | 0.00216 | **   |
|       | C56:4     | 928.8328   | [M + NH4]+ | 67.10  | 7231017   | 5723618   | 6413748      | 3405892      | 3534729      | 3055598      | 6456128      | 3332073      | 0.00243 | **   |
|       | C56:3     | 930.8484   | [M + NH4]+ | 67.40  | 34544365  | 32404478  | 30861651     | 33973705     | 32835332     | 32301368     | 32603498     | 33036801     | 0.73124 | *    |
|       | C56:2     | 932.8646   | [M + NH4]+ | 67.60  | 42720659  | 36224213  | 39005403     | 30660080     | 29426988     | 31424399     | 39316758     | 30503822     | 0.01104 | **   |
|       | C56:8     | 948.8015   | [M + NH4]+ | 66.10  | 3256653   | 2656543   | 2933379      | 967212       | 1183177      | 959211       | 2948858      | 1036533      | 0.00053 | ***  |
|       | C58:4     | 956.8641   | [M + NH4]+ | 67.50  | 4180508   | 4032023   | 4304070      | 2514727      | 2345456      | 2054329      | 4172200      | 2304838      | 0.00028 | ***  |
|       | C58:3     | 958.8797   | [M + NH4]+ | 67.80  | 19028963  | 16729044  | 17922880     | 16310355     | 15765760     | 15605870     | 17893629     | 15893995     | 0.04561 | *    |
|       | C58:2     | 960.8954   | [M + NH4]+ | 68.10  | 27375805  | 28087535  | 31470948     | 28004067     | 25733355     | 28004149     | 28978096     | 26005524     | 0.14866 | *    |
|       | C58:1     | 962.9110   | [M + NH4]+ | 68.40  | 17882572  | 17365995  | 18549479     | 12380452     | 12426895     | 13081428     | 17932682     | 12629591     | 0.00021 | ***  |
|       | C60:4     | 984.8954   | [M + NH4]+ | 67.90  | 3721753   | 3741482   | 3354174      | 2525957      | 2542965      | 2632912      | 3605803      | 2567278      | 0.00134 | **   |
|       | C60:3     | 986.9110   | [M + NH4]+ | 68.20  | 18129483  | 17009169  | 18726215     | 15344855     | 13847066     | 13944331     | 17954955     | 14378751     | 0.00688 | **   |
|       | C60:2     | 988.9267   | [M + NH4]+ | 68.60  | 27156154  | 22298774  | 24757050     | 20577426     | 19620134     | 19726528     | 24737326     | 19974696     | 0.02938 | **   |
|       | C60:1     | 990.9423   | [M + NH4]+ | 68.90  | 11644493  | 12556570  | 11727229     | 8987471      | 7973432      | 8555374      | 11976097     | 8505425      | 0.00110 | **   |
|       | C62:3     | 1014.9423  | [M + NH4]+ | 68.80  | 10640435  | 9206381   | 10299817     | 9634582      | 7852501      | 8669457      | 10048878     | 8718847      | 0.11915 | *    |
|       | C51:7     | 852.7312   | [M + NH4]+ | 63.9   | 1490103   | 1266271   | 1276157      | Not detected | Not detected | Not detected | 1344177      | Not detected | <0.05   | *    |
|       | C56:5     | 926.8218   | [M + NH4]+ | 66.4   | 11026173  | 11149864  | 10352971     | 4160417      | 3913553      | 3907632      | 10843003     | 3993867      | 0.00001 | **** |
|       | C58:7     | 950.8239   | [M + NH4]+ | 66.3   | 5960373   | 5929833   | 5156673      | 1825744      | 1898428      | 1770863      | 5682293      | 1831679      | 0.00013 | **** |
|       | C60:6     | 980.8737   | [M + NH4]+ | 67.1   | 10343708  | 10319739  | 10330029     | 5270674      | 5005689      | 5165589      | 10331159     | 5147318      | 0.00000 | **** |
|       | C58:6     | 952.8375   | [M + NH4]+ | 66.6   | 9178808   | 8518452   | 8342914      | 3059488      | 3466369      | 2845353      | 8680058      | 3123737      | 0.00006 | **** |
|       | C58:5     | 954.8536   | [M + NH4]+ | 66.8   | 6803474   | 7134154   | 6249314      | 2604811      | 2643786      | 2563938      | 6728981      | 2604178      | 0.00009 | **** |
|       | C62:7     | 1006.8930  | [M + NH4]+ | 67.1   | 2056442   | 1773413   | 1759150      | 778458       | 847957       | 722166       | 1863001      | 782860       | 0.00047 | **   |
| C62:5 | 1010.9123 | [M + NH4]+ | 67.7       | 988446 | 1102094   | 984616    | Not detected | Not detected | Not detected | 1025052      | Not detected | <0.05        | *       |      |
| C64:6 | 1036.9263 | [M + NH4]+ | 67.8       | 932465 | 984167    | 930174    | Not detected | Not detected | Not detected | 948935       | Not detected | <0.05        | *       |      |

|       |        |           |           |           |           |           |           |           |           |           |           |           |         |    |
|-------|--------|-----------|-----------|-----------|-----------|-----------|-----------|-----------|-----------|-----------|-----------|-----------|---------|----|
| DAGS  | C36:3  | 601.52    | [M - OH]+ | 59.84     | 9834835   | 12344870  | 9731473   | 11999049  | 11469219  | 13517774  | 10637059  | 12328681  | 0.18315 | *  |
|       | C34:2  | 575.50    | [M - OH]+ | 59.26     | 840900    | 919442    | 763196    | 859564    | 637609    | 902823    | 841179    | 799999    | 0.68306 | *  |
|       | C32:1  | 549.49    | [M - OH]+ | 47.70     | 4483392   | 3993321   | 4513737   | 4188437   | 3209320   | 4211603   | 4330150   | 3869787   | 0.28230 | *  |
|       | C34:1  | 577.52    | [M - OH]+ | 60.10     | 72634861  | 64792620  | 68668581  | 56172824  | 68295934  | 57728911  | 68698687  | 60732556  | 0.14657 | *  |
|       | C36:1  | 605.55    | [M - OH]+ | 62.00     | 182729871 | 150689941 | 170549567 | 115949743 | 136474033 | 117361787 | 167989793 | 123261854 | 0.01742 | *  |
|       | C38:5  | 625.52    | [M - OH]+ | 60.70     | 51168018  | 47290656  | 47910205  | 34235602  | 39855810  | 36054090  | 48789626  | 36715167  | 0.00413 | ** |
| C38:4 | 627.54 | [M - OH]+ | 61.60     | 109118440 | 96833756  | 109703940 | 65786430  | 78551097  | 61398443  | 105218712 | 68578657  | 0.00526   | **      |    |

|      |       |        |          |       |          |          |          |          |          |          |          |          |         |    |
|------|-------|--------|----------|-------|----------|----------|----------|----------|----------|----------|----------|----------|---------|----|
| LPCs | C16:0 | 496.34 | [M + H]+ | 43.97 | 72319264 | 71552312 | 91413960 | 40321109 | 39579221 | 37904453 | 78428512 | 39268261 | 0.00390 | ** |
|      | C18:1 | 522.36 | [M + H]+ | 44.67 | 43762852 | 35642654 | 34309162 | 21570697 | 27022121 | 20753873 | 37904889 | 23115564 | 0.01407 | ** |
|      | C18:0 | 524.37 | [M + H]+ | 46.69 | 62531312 | 53540494 | 53470501 | 38801867 | 33491454 | 37088215 | 56514102 | 36460512 | 0.00409 | ** |

|       |        |          |          |          |           |           |           |           |           |           |           |           |         |     |
|-------|--------|----------|----------|----------|-----------|-----------|-----------|-----------|-----------|-----------|-----------|-----------|---------|-----|
| PCs   | C32:1  | 732.55   | [M + H]+ | 56.03    | 781267943 | 804044945 | 810686176 | 780196397 | 854287692 | 846526732 | 798666355 | 827003607 | 0.32273 | *   |
|       | C32:0  | 734.57   | [M + H]+ | 56.71    | 153548162 | 152664086 | 159077459 | 186215277 | 187669844 | 192774036 | 155096569 | 188886386 | 0.00028 | *** |
|       | C34:1  | 760.59   | [M + H]+ | 57.23    | 517483460 | 512505580 | 502099113 | 527621205 | 530422377 | 534815869 | 510690051 | 530953150 | 0.01538 | *   |
|       | C34:2  | 758.57   | [M + H]+ | 56.91    | 375706586 | 359730453 | 384367870 | 475406903 | 415276406 | 501519315 | 373268303 | 464067541 | 0.02673 | *   |
|       | C34:3  | 756.55   | [M + H]+ | 55.64    | 18153311  | 17959048  | 18389415  | 16702795  | 21771820  | 22244100  | 18167258  | 20239571  | 0.30857 | *   |
|       | C36:4  | 782.57   | [M + H]+ | 56.40    | 40612586  | 42479257  | 44564158  | 27762171  | 28823462  | 28968729  | 42552000  | 28518120  | 0.00031 | *** |
|       | C36:3  | 784.59   | [M + H]+ | 56.95    | 60806496  | 66120434  | 65827621  | 59401947  | 56414713  | 57445736  | 64251517  | 57754132  | 0.02833 | *** |
| C38:4 | 810.60 | [M + H]+ | 56.92    | 15471957 | 16016010  | 15236444  | 11369983  | 11577002  | 11683807  | 15574804  | 11543598  | 0.00008   | ****    |     |

|                     |       |          |          |       |          |          |          |          |          |          |          |          |         |   |
|---------------------|-------|----------|----------|-------|----------|----------|----------|----------|----------|----------|----------|----------|---------|---|
| dihydroshingonamine | C24:1 | 815.7001 | [M + H]+ | 60.7  | 36890287 | 36825205 | 40258306 | 40728293 | 41596668 | 36523541 | 37991266 | 39616167 | 0.44803 | * |
|                     | C24:0 | 817.7157 | [M + H]+ | 61.2  | 8730541  | 7218495  | 7747127  | 6039845  | 4756886  | 5288013  | 7898721  | 5361581  | 0.01183 | * |
|                     | C22:1 | 787.6688 | [M + H]+ | 59.50 | 19203533 | 17317440 | 16580144 | 19042923 | 18700445 | 17826226 | 17700372 | 18523198 | 0.39338 | * |

|                |       |          |                      |       |           |           |           |           |           |           |           |           |           |
|----------------|-------|----------|----------------------|-------|-----------|-----------|-----------|-----------|-----------|-----------|-----------|-----------|-----------|
| sphingomyelins | C16:1 | 703.5749 | [M + H] <sup>+</sup> | 55.1  | 179178696 | 211842112 | 184257159 | 201274083 | 189923458 | 175296609 | 191759322 | 188831383 | 0.82805   |
|                | C14:1 | 675.5436 | [M + H] <sup>+</sup> | 53.65 | 33391238  | 31418122  | 35433074  | 27411490  | 27121125  | 25939186  | 33414145  | 26823933  | 0.00609** |
|                | C14:0 | 677.5672 | [M + H] <sup>+</sup> | 54.5  | 31345524  | 31345222  | 34524074  | 34411490  | 33121125  | 26839186  | 32404940  | 31457267  | 0.73078   |
| sphingomyelins | C24:1 | 813.6844 | [M + H] <sup>+</sup> | 60.1  | 152175891 | 134835745 | 140597586 | 190982011 | 177507619 | 180276620 | 142536407 | 182922083 | 0.00351** |
|                | C16:1 | 701.5592 | [M + H] <sup>+</sup> | 54.1  | 108103680 | 98981127  | 85896474  | 99477494  | 79517981  | 93642402  | 97660427  | 90879292  | 0.48182   |
|                | C18:0 | 731.6062 | [M + H] <sup>+</sup> | 56.8  | 5353896   | 5089794   | 4798456   | 4512350   | 4574387   | 4362947   | 5080715   | 4483228   | 0.02561*  |
|                | C18:1 | 729.5905 | [M + H] <sup>+</sup> | 55.8  | 1131921   | 1285876   | 1176799   | 1084478   | 1163940   | 1087312   | 1198199   | 1111910   | 0.17627   |
|                | C26:1 | 841.7157 | [M + H] <sup>+</sup> | 60.6  | 94948460  | 78447778  | 83014349  | 77517917  | 75202032  | 76614273  | 85470196  | 76444741  | 0.14324   |
|                | C26:0 | 843.7314 | [M + H] <sup>+</sup> | 61.6  | 39349578  | 33057288  | 32858262  | 39852056  | 42140862  | 38775411  | 35088376  | 40256110  | 0.09285   |
